# Supplementary material for: Reversing oncogenic transformation with iron chelation
Source: PubMed Central journal article supplement (PMC7825639; doi:10.18632/oncotarget.27866), 2021-01-19
Supplement: oncotarget-12-106-s001.pdf [file oncotarget-12-106-s001.pdf]

## Reversing oncogenic transformation with iron chelation

### SUPPLEMENTARY MATERIALS

**Supplementary Table 1: The mechanism behind iron chelation.** See Supplementary Table 1

**Supplementary Table 2: Iron chelators response in clinical trials.** See Supplementary Table 2
